# Supplementary material for: A systematic review and meta-analysis of digital application use in clinical research in pain medicine
Source: PubMed Central journal article supplement (PMC9668017; doi:10.3389/fdgth.2022.850601), 2022-11-02
Supplement: Image1.pdf [file Image1.pdf]

**Supplementary Figure 1: Mathematical model for data analysis**

$$x_e^0 \sim \mathcal{N}(m_e^0, s_e^{0^2})$$

$$x_e^1 \sim \mathcal{N}(m_e^1, s_e^{1^2})$$

$$x_c^0 \sim \mathcal{N}(m_c^0, s_c^{0^2})$$

$$x_c^1 \sim \mathcal{N}(m_c^1, s_c^{1^2})$$
